# Supplementary material for: Genome-Wide Identification and Analysis of MAPK and MAPKK Gene Families in Brachypodium distachyon
Source: PLoS One. 2012 Oct 17;7(10):e46744. doi: 10.1371/journal.pone.0046744 (PMC3474763; doi:10.1371/journal.pone.0046744)
Supplement: Table S6 — The expression profiles (log2 based value) of the two family genes of Brachypodium and rice under different and temperature conditions. (XLSX) [file pone.0046744.s010.xlsx]

## Sheet: Sheet1
Supplemetary Table S6: The expression profiles (log2 based value) of the two family genes of Brachypodium and rice under different and temperature conditions.
BdMPK
gene	LDHC_0hrs	LDHC_4hrs	LDHC_8hrs	LDHC_12hrs	LDHC_16hrs	LDHC_20hrs	LDHC_24hrs	LDHC_28hrs	LDHC_32hrs	LDHC_36hrs	LDHC_40hrs	LDHC_44hrs	LDHC_48hrs	LDHH_0hrs	LDHH_4hrs	LDHH_8hrs	LDHH_12hrs	LDHH_16hrs	LDHH_20hrs	LDHH_24hrs	LDHH_28hrs	LDHH_32hrs	LDHH_36hrs	LDHH_40hrs	LDHH_44hrs	LDHH_48hrs	LLHC_0hrs	LLHC_4hrs	LLHC_8hrs	LLHC_12hrs	LLHC_16hrs	LLHC_20hrs	LLHC_24hrs	LLHC_28hrs	LLHC_32hrs	LLHC_36hrs	LLHC_40hrs	LLHC_44hrs	LLHC_48hrs
BdMPK3	7.905	7.685	8.045	7.93	7.9	7.605	7.985	7.82	8.4	8.33	7.655	7.675	7.74	8.245	7.965	7.76	7.615	8.065	8.585	8.195	7.78	7.87	7.435	9.105	8.21	8.55	7.605	7.635	7.755	7.595	7.995	8.025	8.37	8.265	7.99	7.59	8.135	7.665	8.065	7.665	8.565	7.995	7.375	8.375	8.225	8.685	8.03	7.78	8.255
BdMPK4	9.635	9.625	9.715	9.425	9.725	9.66	9.655	9.575	9.565	9.68	9.455	9.685	9.655	9.715	9.495	9.335	9.24	9.485	9.74	9.71	9.42	9.46	9.305	9.67	9.615	9.925	9.435	9.535	9.5	9.635	9.655	9.775	9.685	9.715	9.645	9.53	9.755	9.515	9.525	9.35	9.315	9.665	9.185	9.42	9.585	9.715	9.255	8.81	7.645
BdMPK6	10.57	10.515	9.935	10.3	10.29	10.545	10.58	10.45	9.93	10.24	10.45	10.48	10.595	10.615	10.335	10.25	10.225	10.385	10.505	10.6	10.285	10.23	10.16	10.29	10.44	10.565	10.395	10.35	10.31	10.29	10.3	10.705	10.44	10.495	10.325	10.455	10.43	10.485	10.48	10.16	10.07	10.265	9.92	9.94	10.07	9.76	10.04	9.795	8.395
BdMPK7-1	11.41	11.45	12.35	11.66	11.87	11.35	11.9	11.75	12.08	11.67	11.01	11.27	11.24	11.84	11.52	11.57	11.53	11.3	11.32	11.55	11.35	11.66	11.43	11.53	11.43	11.45	11.28	11.45	11.58	11.26	11.24	11.48	11.33	11.72	11.33	11.46	11.5	11.59	11.45	11.16	11.17	11.12	11.04	11.26	11.52	10.64	11.06	11.17	10.81
BdMPK7-2	NA	NA	NA	NA	NA	NA	NA	NA	NA	NA	NA	NA	NA	NA	NA	NA	NA	NA	NA	NA	NA	NA	NA	NA	NA	NA	NA	NA	NA	NA	NA	NA	NA	NA	NA	NA	NA	NA	NA	NA	NA	NA	NA	NA	NA	NA	NA	NA	NA
BdMPK11	8.2	8.215	7.62	8.025	8.25	8.28	8.53	8.09	7.07	8.005	8.08	8.07	8.06	8.52	8.065	8.075	8.285	8.12	8.41	8.385	7.855	8.06	7.87	8.1	8.045	8.28	8.125	7.91	7.745	7.89	8.14	8.11	7.975	7.88	7.88	7.99	8.155	8.015	8.16	6.73	6.475	6.615	6.72	6.97	7.25	7.055	6.57	5.745	5.48
BdMPK14	8.505	8.68	8.785	8.615	8.445	8.76	8.92	8.54	8.235	8.335	8.495	8.625	8.55	8.515	9.1	9.01	8.85	8.2	8.455	8.36	9.005	8.915	8.965	8.55	8.35	8.405	8.36	9.035	9.045	9.13	8.615	8.785	8.765	9.28	9.165	9.205	8.78	8.35	8.56	8.51	8.29	8.71	7.945	8.37	8.205	8.46	8.135	7.95	6.745
BdMPK16	10.065	10.11	9.725	9.67	9.4	9.89	9.75	9.97	9.495	9.84	9.835	9.855	10.02	10.1	10.14	9.855	9.76	9.995	9.99	10.335	9.97	9.76	9.79	9.975	10.165	10.225	10.125	9.97	9.97	9.995	10.065	10.06	10.315	9.96	9.995	10	10.055	10.2	10.08	9.33	9.06	9.59	9.215	9.39	9.425	9.435	8.985	9	7.615
BdMPK17	10.235	9.9	11.235	10.095	10.155	10.02	10.17	9.885	11.07	10.88	10.19	10.095	10.14	10.11	9.935	9.965	9.68	10.36	10.24	10.315	9.775	9.995	9.83	10.605	10.15	10.195	9.91	10.075	10.195	10.055	10.16	10.13	10.135	10.29	10.09	9.93	10.2	10.02	9.95	9.3	8.995	9.495	9.17	9.31	9.245	9.085	9.01	8.975	7.575
BdMPK20-1	10.14	9.955	9.92	9.695	10.105	10.085	10.425	9.825	9.88	9.755	10	10.13	10.19	10.215	10.015	9.875	9.73	10.065	9.92	10.07	9.8	9.71	9.66	9.97	9.97	9.985	10.145	9.89	9.9	9.865	10.215	10.035	10.19	9.97	10.035	9.955	10.265	10.365	10.32	8.785	8.55	9.17	8.92	8.79	9.175	9.105	8.55	8.67	7.475
BdMPK20-2	NA	NA	NA	NA	NA	NA	NA	NA	NA	NA	NA	NA	NA	NA	NA	NA	NA	NA	NA	NA	NA	NA	NA	NA	NA	NA	NA	NA	NA	NA	NA	NA	NA	NA	NA	NA	NA	NA	NA	NA	NA	NA	NA	NA	NA	NA	NA	NA	NA
BdMPK20-3	8.78	9.305	9.61	9.175	9.105	9.075	8.845	9.2	9.535	8.94	8.92	8.87	8.715	8.645	9.425	9.635	9.255	8.63	8.525	8.495	9.4	9.58	9.31	8.77	8.58	8.54	8.845	9.25	9.445	9.29	8.91	8.75	8.96	9.235	9.39	9.22	8.96	8.735	8.86	8.06	7.73	8.4	7.99	8.125	8.13	8.27	7.72	7.145	6.585
BdMPK20-4	10.94	10.6	10.35	10.425	9.995	10.76	10.345	10.365	9.58	10.24	10.525	10.52	10.725	10.505	11.38	10.985	11.135	11.42	10.93	10.87	11.365	11.06	11.18	11.305	10.725	10.875	10.74	11.265	11.1	10.92	10.98	10.775	11.02	11.095	10.86	10.765	10.84	10.68	10.835	10.965	10.84	10.98	10.675	10.925	10.85	11.285	11.255	10.945	9.1
BdMPK20-5	NA	NA	NA	NA	NA	NA	NA	NA	NA	NA	NA	NA	NA	NA	NA	NA	NA	NA	NA	NA	NA	NA	NA	NA	NA	NA	NA	NA	NA	NA	NA	NA	NA	NA	NA	NA	NA	NA	NA	NA	NA	NA	NA	NA	NA	NA	NA	NA	NA
BdMPK21-1	7.255	7.46	7.335	7.535	7.485	7.535	7.35	6.91	7.045	7.16	7.595	7.36	6.9	7.42	7.44	7.235	7.295	7.055	7.585	7.555	7.435	7.545	7.22	7.435	7.41	7.38	7.56	7.48	7.45	7.465	7.235	7.34	7.34	7.26	7.325	7.345	7.26	7.265	7.205	6.63	6.755	6.765	6.62	6.73	6.575	6.745	6.535	6.335	6.605
BdMPK21-2	6.51	6.625	6.575	6.61	7.265	6.475	7.055	6.41	7.05	5.965	6.78	6.615	6.7	5.585	6.56	6.815	6.74	6.305	6.26	6.075	6.64	6.72	6.96	6.055	6.155	6.36	5.83	6.99	7.025	6.94	6.71	5.98	6.13	6.96	7.06	6.935	6.26	5.9	6.095	6.135	6.225	6.305	6.135	6.16	6.175	6.19	5.82	5.955	6.075
BdMKK
gene	LDHC_0hrs	LDHC_4hrs	LDHC_8hrs	LDHC_12hrs	LDHC_16hrs	LDHC_20hrs	LDHC_24hrs	LDHC_28hrs	LDHC_32hrs	LDHC_36hrs	LDHC_40hrs	LDHC_44hrs	LDHC_48hrs	LDHH_0hrs	LDHH_4hrs	LDHH_8hrs	LDHH_12hrs	LDHH_16hrs	LDHH_20hrs	LDHH_24hrs	LDHH_28hrs	LDHH_32hrs	LDHH_36hrs	LDHH_40hrs	LDHH_44hrs	LDHH_48hrs	LLHC_0hrs	LLHC_4hrs	LLHC_8hrs	LLHC_12hrs	LLHC_16hrs	LLHC_20hrs	LLHC_24hrs	LLHC_28hrs	LLHC_32hrs	LLHC_36hrs	LLHC_40hrs	LLHC_44hrs	LLHC_48hrs
BdMKK1	10.55	10.885	10.225	10.41	10.355	10.455	10.39	10.635	10.025	10.775	10.4	10.59	10.675	11.15	11.265	11.015	11.015	11.195	11.065	11.17	11.165	11.045	10.83	11.185	11.005	11.19	10.96	11.01	10.97	10.8	10.94	11	11.08	11.105	10.925	10.62	11.045	11.03	11.075	11.375	11.23	11.35	11.165	11.41	11.295	11.385	11.11	11.035	10.255
BdMKK3-1	9.015	8.7	8.97	9.015	8.815	8.89	8.9	8.825	9.215	9.03	8.88	8.89	8.95	8.81	8.58	8.7	8.555	8.74	8.94	8.83	8.985	8.825	8.8	8.6	9.025	8.88	9.055	8.83	8.81	8.85	8.805	9.165	8.93	8.73	8.815	8.755	8.78	8.825	8.72	7.545	7.415	7.605	7.59	7.475	7.42	7.705	7.39	7.095	6.5
BdMKK3-2	8.46	8.415	8.38	8.05	8.41	8.615	8.665	8.42	8.315	8.375	8.635	8.455	8.74	8.115	8.455	8.21	7.96	8.24	8.14	8.44	8.22	8.14	8.13	8.215	8.45	8.345	8.18	8.095	8.205	8.19	8.405	8.315	8.105	7.91	8.36	8.24	7.855	8.01	7.99	7.46	6.615	7.425	6.71	6.89	7.17	7.115	6.695	6.55	6.055
BdMKK3-3	7.495	7.8	8.73	8.025	8.615	7.785	8.41	7.74	9.07	7.535	7.64	7.765	7.61	8.375	8.085	8.025	7.735	7.875	8.135	8.255	7.915	8.01	8.03	8.485	8.165	8.29	7.83	7.55	8.265	7.99	8.08	8.315	8.375	7.945	7.98	7.64	8.545	8.18	7.685	6.655	6.2	7.21	6.285	6.975	7.025	7.81	6.935	6.09	5.815
BdMKK4	7.73	7.135	6.035	6.52	6.505	7.29	7.35	6.03	5.385	6.655	7.18	7.31	7.2	6.755	7.21	7.405	6.6	7.75	7.155	6.735	7.145	6.905	6.52	7.235	6.845	6.83	5.955	6.91	6.515	6.82	7.415	6.705	6.68	7.295	6.78	7.275	6.77	6.66	7.225	6.4	6.34	6.575	6.435	6.615	6.4	6.375	5.88	6.315	6.005
BdMKK5	9.065	8.32	9.115	8.695	9.23	9.075	9.05	8.8	9.88	9.045	8.9	9.315	8.895	8.395	8.775	8.605	8.42	8.695	8.75	8.775	8.355	8.695	8.405	8.815	8.635	8.8	8.45	8.74	8.705	8.785	8.59	8.795	8.81	8.94	9.03	8.8	8.735	8.835	8.77	7.355	7.01	7.75	7.43	7.25	7.99	7.85	7.085	6.79	6.715
BdMKK6	10.61	10.445	10.7	10.44	10.66	10.61	10.665	10.49	10.985	10.5	10.65	10.61	10.59	10.645	10.415	10.31	10.34	10.605	10.61	10.7	10.405	10.385	10.425	10.615	10.64	10.67	10.735	10.58	10.64	10.61	10.59	10.64	10.77	10.61	10.55	10.48	10.6	10.625	10.66	10.215	9.91	10.315	9.96	10.22	10.285	10.54	9.95	9.775	8.45
BdMKK10-1	NA	NA	NA	NA	NA	NA	NA	NA	NA	NA	NA	NA	NA	NA	NA	NA	NA	NA	NA	NA	NA	NA	NA	NA	NA	NA	NA	NA	NA	NA	NA	NA	NA	NA	NA	NA	NA	NA	NA	NA	NA	NA	NA	NA	NA	NA	NA	NA	NA
BdMKK10-2	6.58	5.22	5.58	6.465	6.105	6.97	6.31	4.78	5.355	6.48	6.215	6.315	6.825	6.325	6.135	6.23	6.24	6.355	6.04	5.955	6.05	6.325	6.005	6.795	6.125	5.78	5.695	5.86	6.15	5.935	6.285	6.465	6.28	6.105	6.37	6.36	5.75	6.22	5.845	6.315	5.815	5.835	5.845	6.045	6.265	5.64	5.915	5.495	5.36
BdMKK10-3	6.28	5.97	5.99	5.85	6.04	6.25	6.45	6.1	5.66	6.08	6.02	6.08	5.81	5.75	5.67	5.95	5.93	5.46	5.66	5.62	5.83	5.57	5.94	5.97	5.79	5.85	6.21	5.91	5.48	5.75	5.7	5.77	5.89	5.78	5.92	5.89	5.74	5.75	6.06	6.84	7.2	6.42	6.9	7.24	6.85	7.07	7.37	6.69	7.6
BdMKK10-4	5.85	5.97	5.58	5.7	5.57	5.89	6.05	5.98	5.68	5.78	6.02	5.96	5.66	5.74	5.95	5.42	5.68	5.52	5.5	5.56	5.42	5.69	5.8	5.49	5.66	5.63	5.83	5.75	5.23	5.68	5.63	5.6	5.69	5.47	5.65	5.78	5.77	5.68	6.43	5.59	6.2	5.22	5.95	6.38	5.72	6.27	6.41	5.6	6.92
BdMKK10-5	7.19	6.73	6.53	6.96	6.71	6.62	7.08	7.01	6.56	6.65	6.86	6.79	6.46	6.74	6.43	6.48	6.55	6.43	6.27	6.52	6.48	6.69	6.68	6.55	6.43	6.72	6.97	6.57	6.4	6.67	6.23	6.43	6.49	6.74	6.36	6.7	6.68	6.53	7.11	6.1	6.25	5.7	6.3	6.94	6.23	6.4	6.43	5.68	7.09
OsMPK
gene	LDHC_0hrs	LDHC_4hrs	LDHC_8hrs	LDHC_12hrs	LDHC_16hrs	LDHC_20hrs	LDHC_24hrs	LDHC_28hrs	LDHC_32hrs	LDHC_36hrs	LDHC_40hrs	LDHC_44hrs	LDHC_48hrs	LDHH_0hrs	LDHH_4hrs	LDHH_8hrs	LDHH_12hrs	LDHH_16hrs	LDHH_20hrs	LDHH_24hrs	LDHH_28hrs	LDHH_32hrs	LDHH_36hrs	LDHH_40hrs	LDHH_44hrs	LDHH_48hrs	LLHC_0hrs	LLHC_4hrs	LLHC_8hrs	LLHC_12hrs	LLHC_16hrs	LLHC_20hrs	LLHC_24hrs	LLHC_28hrs	LLHC_32hrs	LLHC_36hrs	LLHC_40hrs	LLHC_44hrs	LLHC_48hrs
OsMPK3	8.8518	8.5975	7.7514	8.7073	9.1503	9.1793	8.3447	8.9821	8.4238	8.512	9.8032	9.3638	8.7325	8.8364	8.4939	8.2928	9.8219	10.0858	9.1411	9.3495	8.9598	8.4018	9.6851	9.488	9.2215	8.9052	8.7806	9.2845	9.3548	9.5734	9.8275	9.1137	8.982	8.9153	9.366	9.4532	9.7734	8.9373	9.0797
OsMPK4	11.2092	10.9036	11.0235	11.2843	11.0519	11.1531	11.4011	10.9916	11.3942	11.2969	11.2842	11.3304	11.3296	11.3458	11.1055	11.0311	10.9743	11.2793	10.8849	11.0897	11.0533	11.1418	11.1548	11.3079	11.1108	11.2069	11.2047	11.4103	11.3357	11.4407	11.2518	11.2382	11.3353	11.3546	11.3481	11.381	11.2087	11.3988	11.4068
OsMPK6	10.967	10.2241	9.9528	10.1146	10.37	10.3017	10.9691	10.2855	10.1949	10.1507	10.4433	10.4888	10.8933	10.5517	10.2007	10.179	10.0891	10.6977	10.0475	10.5435	10.5384	10.0198	10.1024	10.1295	10.1914	10.5826	10.9209	10.3524	10.352	10.52	10.7248	11.0719	10.7926	10.2224	10.4216	10.3774	10.5987	11.0521	10.9372
OsMPK7	9.9996	9.9732	10.3299	10.0361	10.5495	10.4025	10.5488	10.302	10.5212	10.3343	11.1248	10.7548	10.1134	10.9425	10.7889	10.3471	10.0371	11.1395	11.069	11.039	10.2395	10.4657	10.3511	10.9854	10.5818	11.0359	10.1866	10.5818	10.6072	10.6771	10.1989	10.1905	10.2855	10.6341	10.4295	10.5742	10.1787	10.0383	9.9902
OsMPK14	11.3203	10.7426	10.3754	11.0759	10.5039	10.8753	11.2394	11.1261	10.5105	10.8955	10.6897	11.221	11.452	10.811	10.9705	10.8876	11.1052	9.8006	10.2758	10.8112	10.9921	10.658	11.0713	10.881	11.0235	11.0862	11.464	11.3328	11.1962	11.1249	11.4073	11.1622	11.2901	11.1788	11.1811	11.2087	11.2937	11.4633	11.269
OsMPK16	7.5202	7.5355	8.1807	8.6829	7.8612	7.8374	6.9456	7.5414	8.3891	7.9207	7.9688	8.0547	7.7377	6.9429	7.2817	8.0939	8.8046	7.0356	7.4633	6.8201	8.1949	8.3542	8.5328	7.8227	7.4298	6.6858	8.5407	7.661	8.2118	7.7754	8.3072	8.5176	8.2553	7.911	7.9371	7.6455	8.1508	8.4901	8.3805
OsMPK17-1	9.9955	10.6973	10.4672	10.7246	10.5325	10.7531	9.9742	10.8954	10.3029	10.3315	11.1092	10.6207	9.6409	9.3571	10.4884	10.3725	10.9128	11.7777	10.8115	9.7565	10.289	10.6591	10.4539	10.1425	10.1186	9.3703	10.342	10.8203	10.5682	10.7837	10.8597	10.3769	10.1902	10.6829	10.3314	10.5146	10.6583	10.1295	10.4739
OsMPK17-2	8.6393	8.7155	8.1427	7.7539	8.496	8.8933	8.784	8.8256	8.4562	8.4595	9.1939	9.2595	8.4046	9.0463	8.3713	8.3191	7.6665	9.932	8.8238	9.289	7.76	8.1892	7.8996	8.6493	8.3079	8.597	8.0032	8.6834	8.1761	8.0091	8.8091	8.965	8.8953	8.5843	8.4696	8.65	9.0122	8.2431	8.378
OsMPK20-1	9.6313	8.8556	8.9904	9.0228	9.5579	9.5204	10.0107	9.341	9.0173	9.3469	10.2384	9.7022	10.0849	10.5553	9.4078	9.1254	9.3265	9.6912	10.6116	10.7631	9.2813	9.286	10.0621	10.0634	9.8102	10.2795	9.502	8.8537	9.6478	9.5159	9.5139	9.6758	9.4238	9.1852	9.1799	9.2764	9.3965	9.4652	9.4969
OsMPK20-2	12.9355	10.7756	9.5439	9.532	8.3219	11.1992	13.0028	11.2551	9.7576	8.875	8.8335	10.7547	13.1258	11.2884	11.4772	10.3196	9.9378	7.0513	9.2662	11.0816	11.6586	9.6008	10.1596	8.8141	9.6189	11.4263	12.3025	10.3428	9.9988	9.7234	11.3141	12.7284	12.1188	10.2297	9.2308	9.7962	11.4204	12.7184	12.111
OsMPK20-3	9.7636	10.9534	11.5801	10.7044	10.1764	11.0686	9.6788	11.0673	11.8619	10.8336	10.6347	10.3357	9.5715	9.5221	11.462	11.9934	10.9577	10.488	9.7136	9.9524	11.0966	11.7328	10.9448	10.3281	10.0734	9.0013	11.0934	11.5077	11.258	10.8436	10.5713	10.6603	11.2638	11.315	11.2581	10.9118	10.3429	10.4805	11.2601
OsMPK20-4	13.8355	12.8569	12.9484	12.9848	13.413	13.1178	14.0194	13.5261	13.3841	13.3958	12.854	13.6544	13.6664	13.2621	12.4605	12.8937	12.4642	12.0223	12.1161	13.1727	12.7575	13.278	12.9351	12.9481	13.2993	13.0471	13.1586	13.0823	13.4111	12.9307	12.6443	13.3284	13.2629	13.0629	13.3076	13.6151	13.063	13.2524	13.1839
OsMPK20-5	12.1254	11.1049	10.925	11.1742	10.2408	11.937	12.4392	11.9435	11.6267	10.742	10.957	10.9801	12.3917	10.6466	11.8261	11.6146	11.9409	7.1683	10.0209	11.0462	12.7628	11.5173	12.6582	12.1947	11.5434	11.3516	12.5021	11.8558	12.0046	11.7311	11.8074	12.5467	12.0034	11.9627	12.0276	11.0993	12.2467	12.4622	12.5723
OsMPK21-1	6.9714	7.2164	6.2206	5.788	7.0281	7.435	6.7495	7.4949	7.0968	6.8604	7.8956	7.8057	6.724	8.1031	7.7857	7.2439	5.1099	8.3284	7.6832	7.8877	7.3175	7.3186	6.9517	8.0414	7.5734	7.4905	5.3108	7.1374	6.8648	6.488	5.5337	5.5495	5.178	7.7291	7.3003	7.167	6.8807	6.1063	5.6942
OsMPK21-2	8.5483	8.0154	8.4572	8.2627	8.4098	8.7116	8.328	8.7683	8.3377	9.1208	8.1293	8.3862	8.0003	8.2635	8.1405	8.3391	8.3377	8.1307	8.3829	8.3645	8.2481	8.3434	8.6736	8.5484	8.6349	8.3121	8.803	8.4819	8.3609	8.3443	8.4337	8.797	8.6891	8.6072	8.7502	8.4694	8.2411	8.3789	8.6202
OsMKK
gene	LDHC_0hrs	LDHC_4hrs	LDHC_8hrs	LDHC_12hrs	LDHC_16hrs	LDHC_20hrs	LDHC_24hrs	LDHC_28hrs	LDHC_32hrs	LDHC_36hrs	LDHC_40hrs	LDHC_44hrs	LDHC_48hrs	LDHH_0hrs	LDHH_4hrs	LDHH_8hrs	LDHH_12hrs	LDHH_16hrs	LDHH_20hrs	LDHH_24hrs	LDHH_28hrs	LDHH_32hrs	LDHH_36hrs	LDHH_40hrs	LDHH_44hrs	LDHH_48hrs	LLHC_0hrs	LLHC_4hrs	LLHC_8hrs	LLHC_12hrs	LLHC_16hrs	LLHC_20hrs	LLHC_24hrs	LLHC_28hrs	LLHC_32hrs	LLHC_36hrs	LLHC_40hrs	LLHC_44hrs	LLHC_48hrs
OsMKK1	8.0073	8.5227	8.6887	8.6988	8.5915	8.5887	8.1609	8.6929	9.1349	9.0026	9.6718	8.9554	8.1315	8.5369	8.8636	8.4058	8.6072	9.3944	8.047	8.0151	7.9507	8.4472	8.4192	8.796	8.3502	8.4781	7.963	8.616	8.4176	8.6418	8.3197	8.3962	8.0121	8.45	8.7714	8.4042	7.8024	8.4984	8.6121
OsMKK3	9.7617	10.1097	9.7751	9.9417	10.0702	9.7308	9.8492	9.7973	9.691	10.083	10.1187	10.1675	9.5364	9.9882	9.7584	9.966	9.6372	10.4563	10.1438	10.1776	9.7668	9.6886	9.953	10.1622	10.0716	9.7286	9.7168	9.8976	9.8692	10.0392	9.9335	10.0114	9.965	9.7566	9.8815	10.0927	9.794	9.9369	9.5825
OsMKK4	7.3722	6.889	7.8883	8.0795	8.3509	7.4737	7.0288	8.05	8.0364	8.4772	9.2123	8.4483	7.2581	7.6571	7.6835	8.1525	9.6221	10.2364	8.7154	7.7664	7.3851	7.7574	8.5173	8.763	8.0996	8.0897	7.8166	8.3338	8.0272	7.9953	8.2649	7.8951	8.2729	8.3624	8.593	7.814	9.455	8.4048	8.967
OsMKK5	10.792	10.7653	10.8703	10.5716	11.388	10.7543	10.9884	10.3699	10.9617	10.7578	11.256	10.8112	10.9852	10.784	10.7604	10.7517	10.0028	11.6289	10.8819	10.4807	10.0927	10.6375	10.1642	10.3863	10.18	10.2665	10.3937	10.4557	11.0209	10.469	10.2982	10.073	10.4747	10.8868	10.6494	10.7814	9.59	10.0555	9.8182
OsMKK6	11.0049	11.3858	11.6868	11.2861	11.3952	11.4916	11.0984	11.4543	11.7477	11.2764	11.5114	11.2493	10.7721	11.1872	11.095	11.5025	11.1884	12.279	11.8994	11.7725	11.5936	11.7173	11.4959	11.3793	11.1957	11.1635	11.627	11.666	11.5464	11.2956	11.5018	11.2932	11.8378	11.5391	11.6255	11.4443	11.4979	11.1396	11.8832
OsMKK10-1	4.4818	4.3003	3.8989	4.3256	4.9516	4.0938	4.5751	6.8426	4.8979	4.539	4.8856	6.3658	4.922	4.2073	4.6064	4.4536	5.2636	4.9509	4.5503	5.2806	4.897	5.0126	5.2601	4.4759	5.0424	6.5762	4.489	4.9258	4.2658	5.45	4.4156	7.0767	3.9152	5.01	4.4621	4.9379	6.3736	7.065	4.7651
OsMKK10-1	4.4818	4.3003	3.8989	4.3256	4.9516	4.0938	4.5751	6.8426	4.8979	4.539	4.8856	6.3658	4.922	4.2073	4.6064	4.4536	5.2636	4.9509	4.5503	5.2806	4.897	5.0126	5.2601	4.4759	5.0424	6.5762	4.489	4.9258	4.2658	5.45	4.4156	7.0767	3.9152	5.01	4.4621	4.9379	6.3736	7.065	4.7651
OsMKK10-3	NA	NA	NA	NA	NA	NA	NA	NA	NA	NA	NA	NA	NA	NA	NA	NA	NA	NA	NA	NA	NA	NA	NA	NA	NA	NA	NA	NA	NA	NA	NA	NA	NA	NA	NA	NA	NA	NA	NA
[truncated: 29 more columns]
